# Supplementary material for: Epidemiology of Injuries in Racquet Sports: a Cross-sectional Study of Specific Injuries Within One Olympic Cycle
Source: Research Square preprint supplement (doi:10.21203/rs.3.rs-5235000/v1), 2024-10-30
Supplement: Supplementary file 1 [file 8df3b6c830c930fe531cf935.docx]

|  | **Most common injuries** | **N (Injuries)** | **Specific injury rate in relation to all injuries  Injuries/Olympiade/Injuries** | **Specific injury rate in relation to athletes  Injuries/Olympiade/Athlete** | **% (of all athletes with specific injury)** |
| --- | --- | --- | --- | --- | --- |
| **Badminton** | 1) Upper ankle joint- ligament injury | 45 | 14 | 0,027 | 14 |
| 2) Foot - ligament injury | 44 | 13 | 0,027 | 13 |
| 3) Knee - unspecified injury | 24 | 7 | 0,015 | 7 |
| **Tennis** | 1) Fibula - muscle injury | 19 | 13 | 0,021 | 10 |
| 2) Shoulder - unspecified injury | 14 | 9 | 0,015 | 8 |
| 3) Foot - ligament injury | 12 | 8 | 0,013 | 7 |
| **Table tennis** | 1) Shoulder - unspecified injury | 19 | 13 | 0,019 | 9 |
| 2) Knee - mensicus injury | 14 | 9 | 0,014 | 7 |
| 3) Upper ankle joint- ligament injury | 11 | 7 | 0,011 | 5 |
